# Supplementary material for: A prospective examination of sex differences in posttraumatic autonomic functioning
Source: PubMed Central journal article supplement — Neurobiol Stress. 2021 Aug 21;15:100384. doi: 10.1016/j.ynstr.2021.100384 (PMC8397921; doi:10.1016/j.ynstr.2021.100384), 2021-08-21

Figure 1. CONSORT diagram

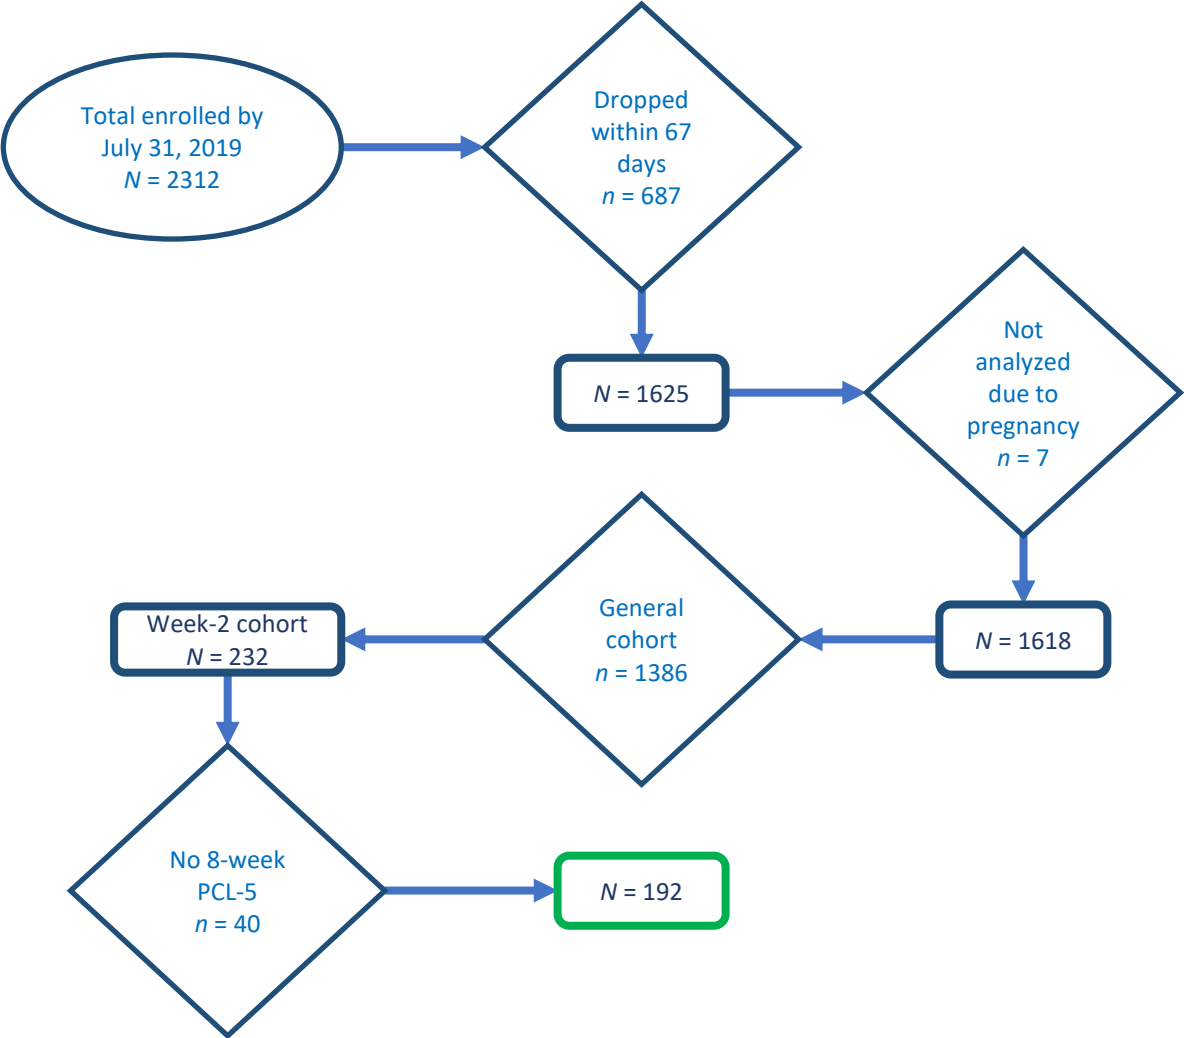

Figure 2a. Percent of men versus women with hypertension at 2-weeks

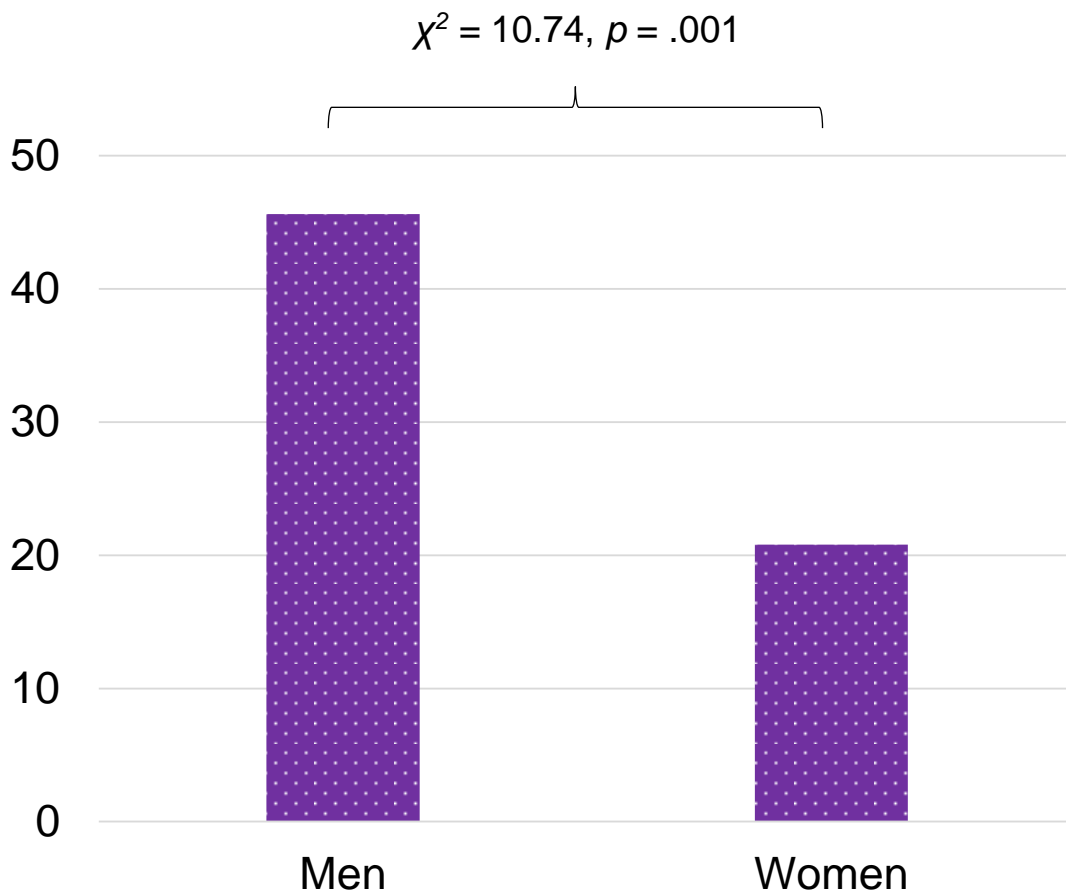

Figure 2b. Main effect of sex on systolic blood pressure at 2-weeks

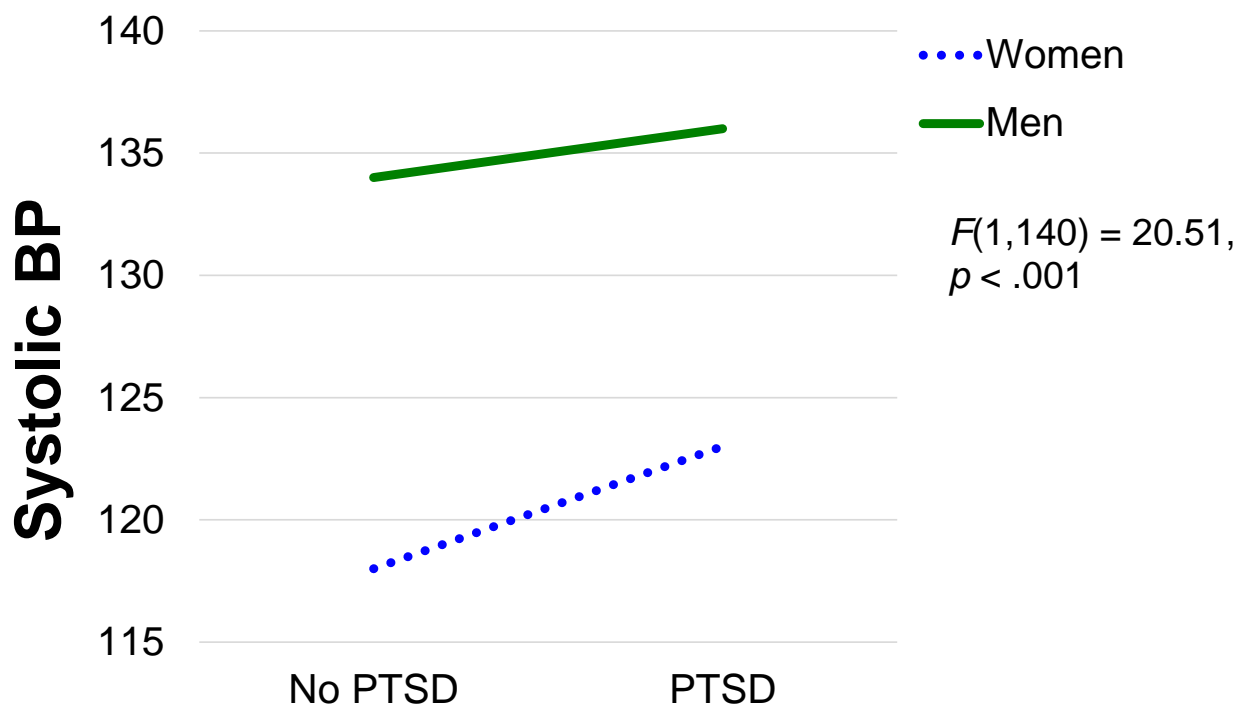

Figure 3a. FPS by sex during fear acquisition at 2-weeks

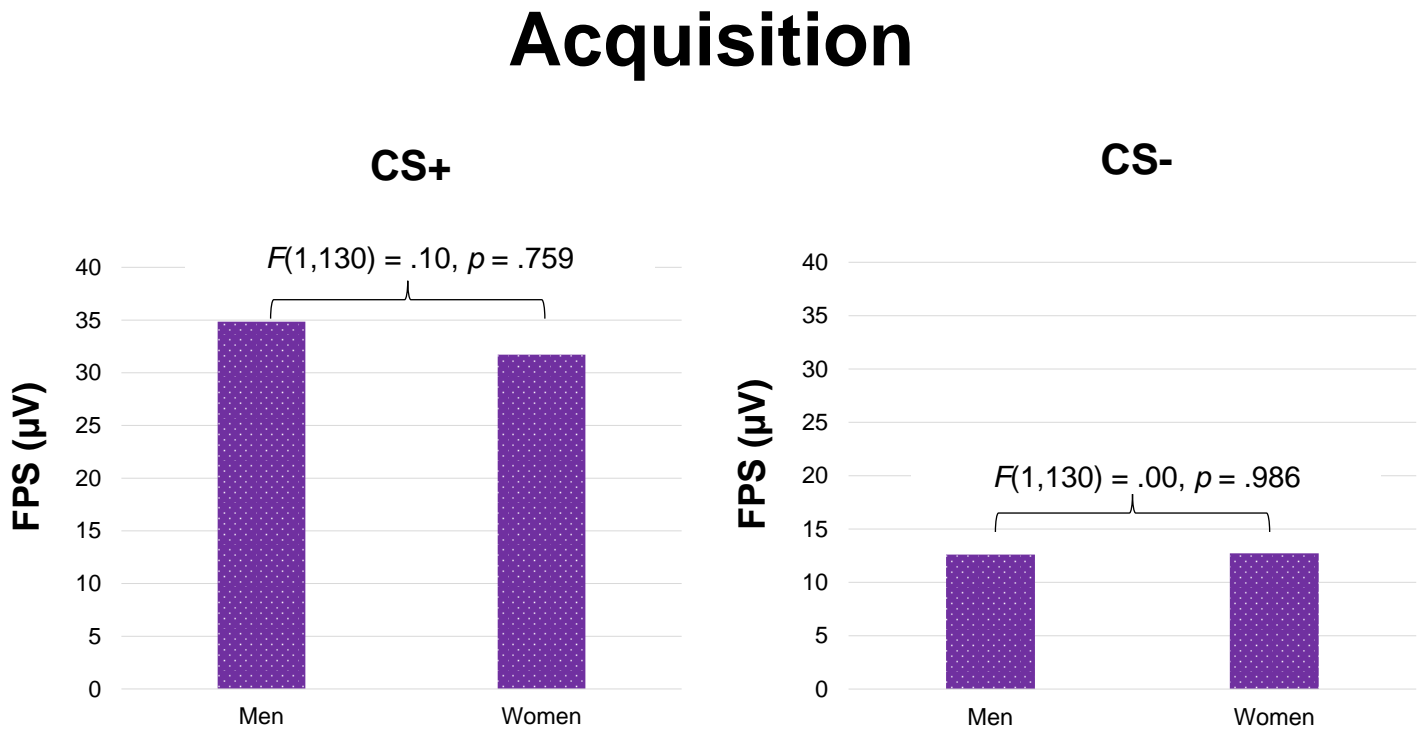

Figure 3b. FPS by sex during fear extinction at 2-weeks

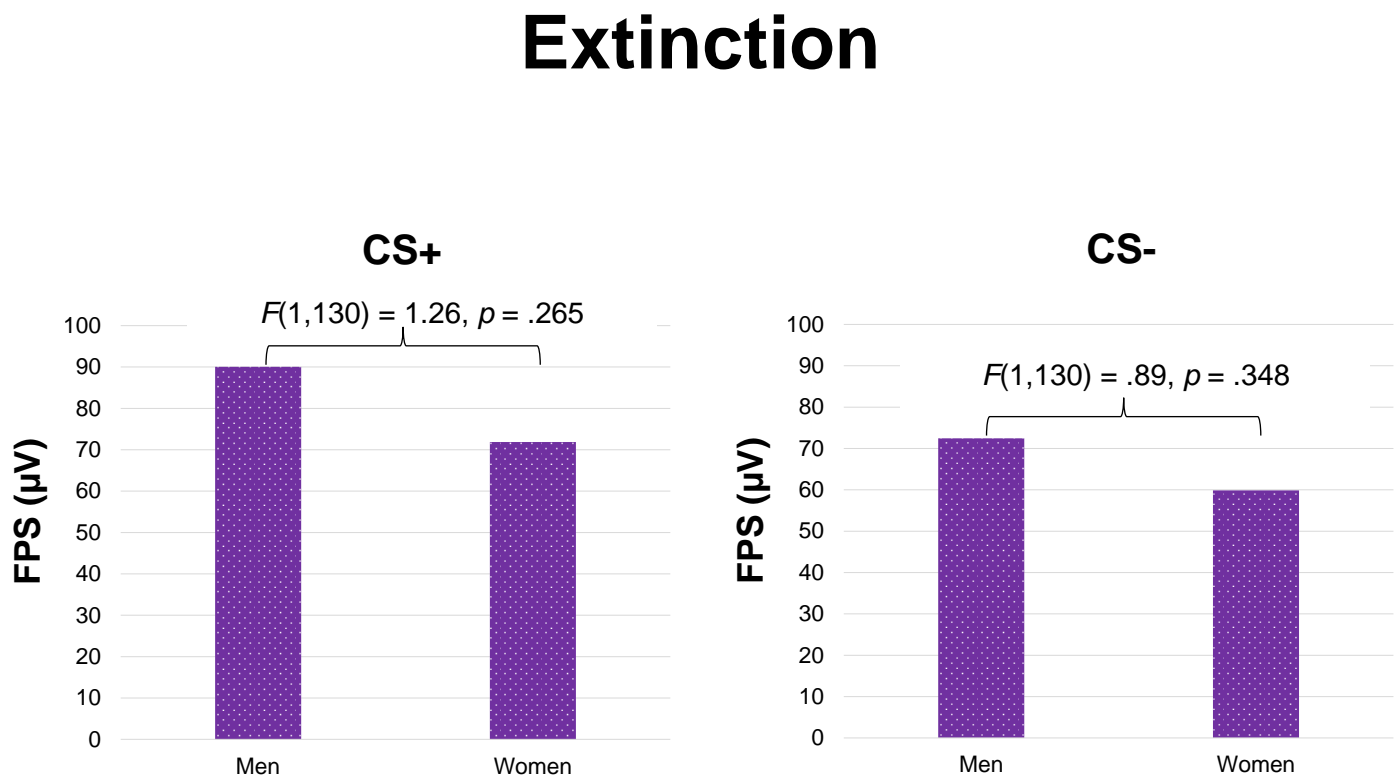

Figure 4a. Sex effect on HR during fear acquisition at 2-weeks

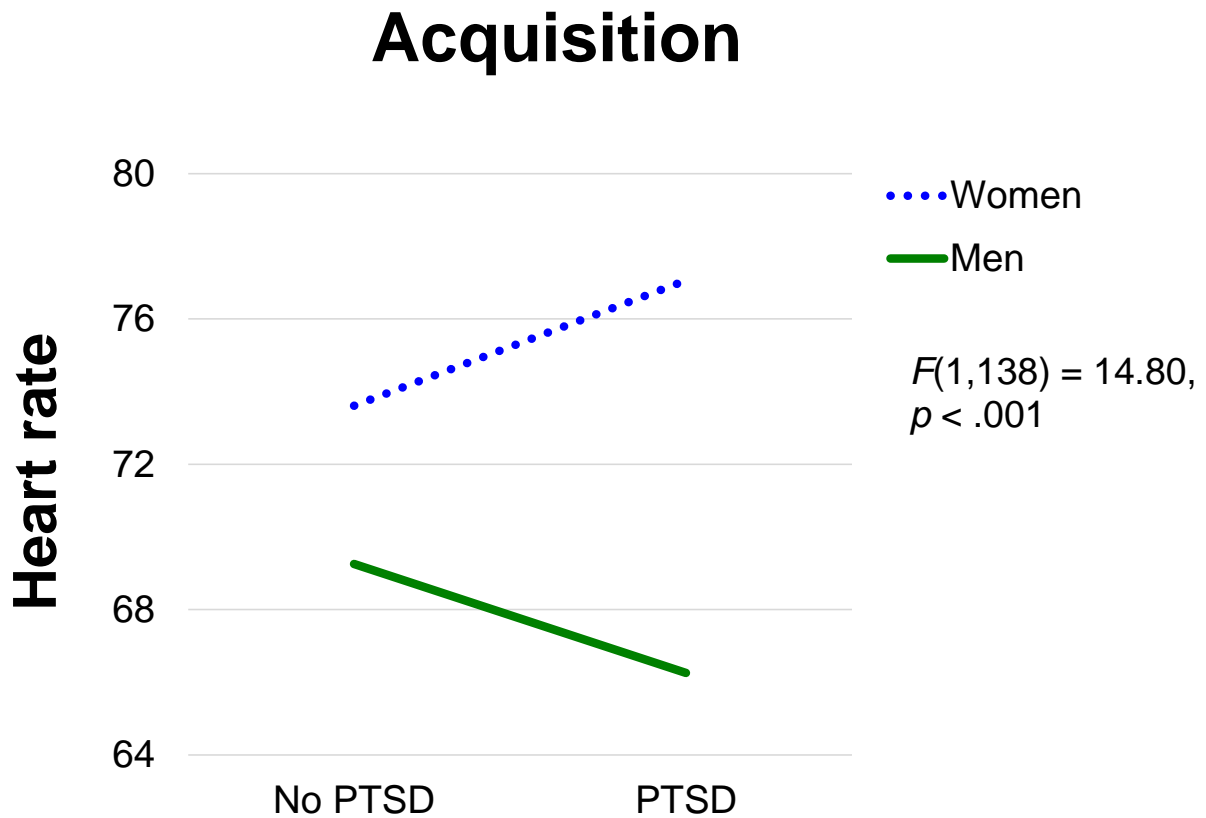

Figure 4b. Sex and interaction effects on HR during fear extinction at 2-weeks

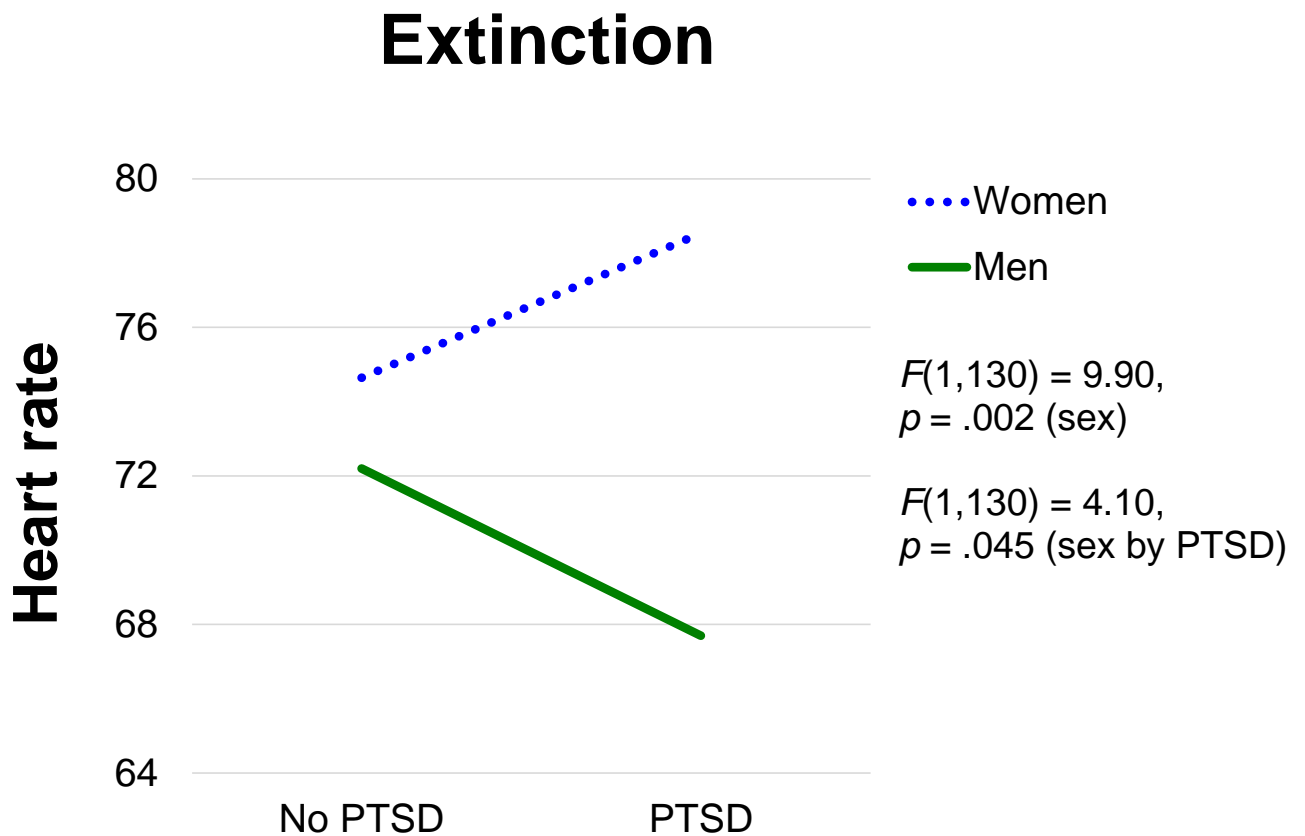

Figure 5a. Sex effect on HF-HRV during fear acquisition at 2-weeks

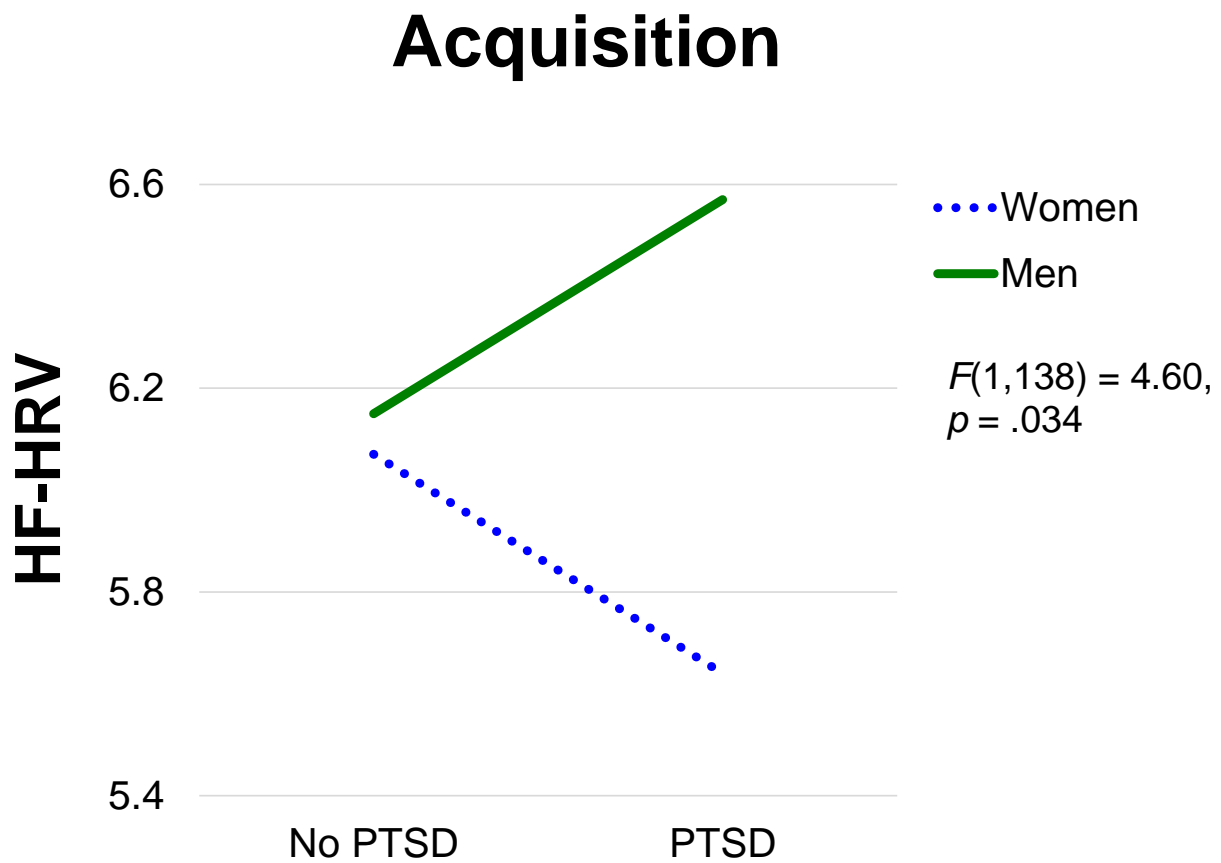

Figure 5b. Interaction effect on HF-HRV during fear extinction at 2-weeks

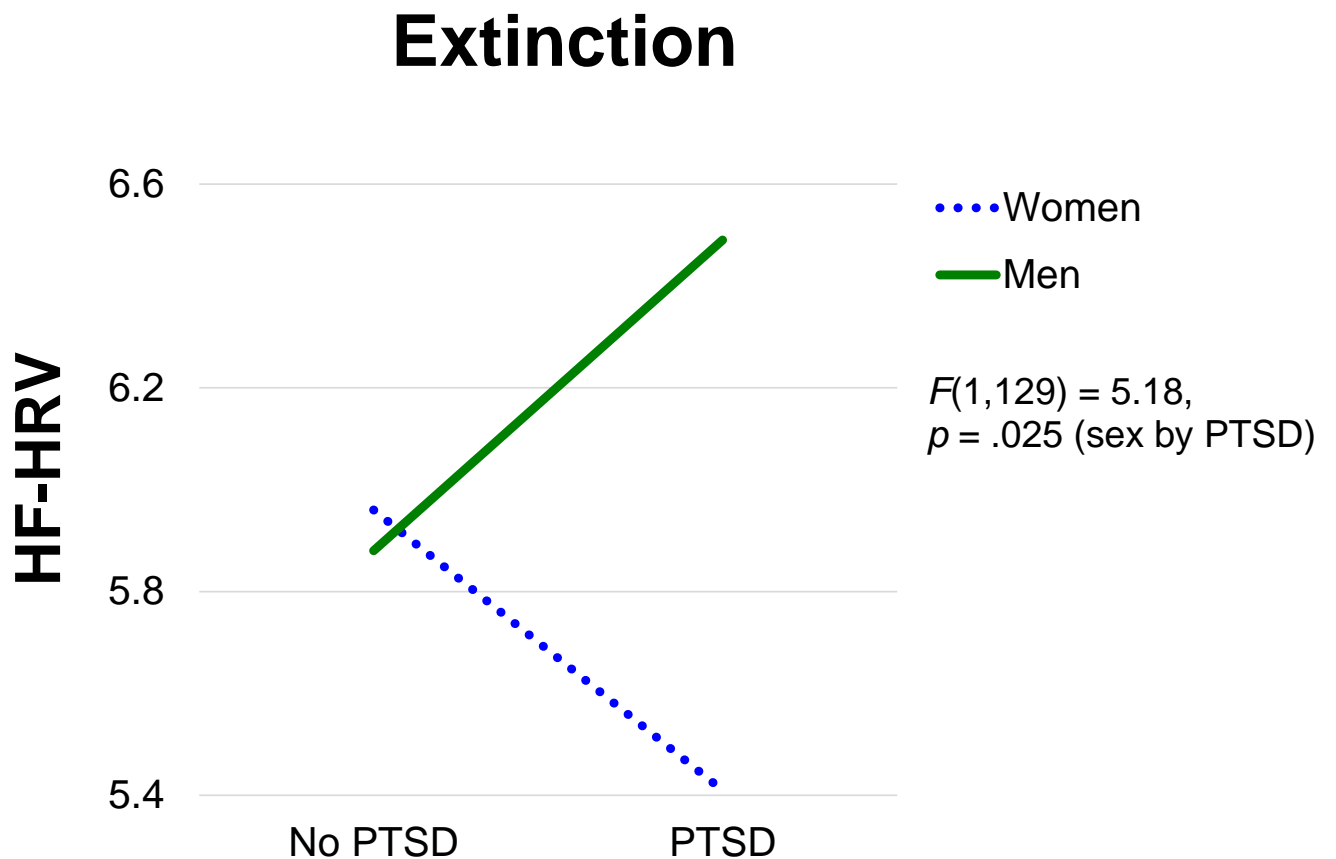

Supplement: mmc1.pdf [file mmc1.pdf]
